# Supplementary material for: P. gingivalis-LPS Induces Mitochondrial Dysfunction Mediated by Neuroinflammation through Oxidative Stress
Source: MDPI journal article supplement (doi:10.3390/ijms24020950), 2023-01-04
Supplement: s1 [file s1]

## Supplementary Data

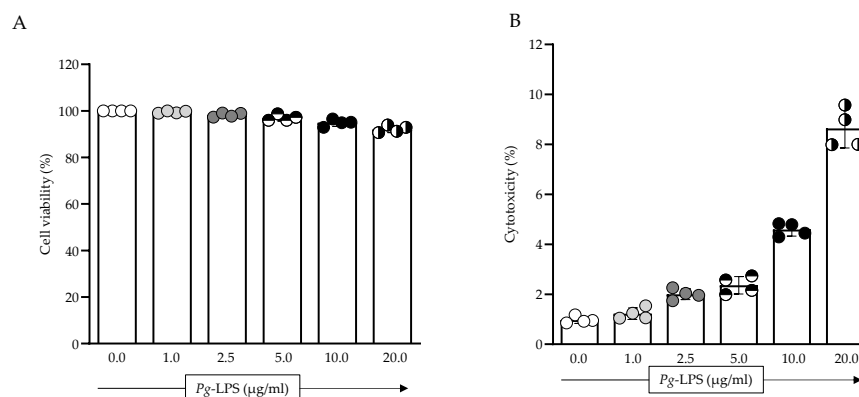

**Supplementary Figure S1.** Effect of *P. gingivalis*-LPS on cells viability with MTS assay (A) and cytotoxicity with LDH assay (B) in SH-SY5Y cells treated with 0, 1.0, 2.5, 5.0, 10.0 and 20.0 μg/ml concentrations of *P. gingivalis*-LPS for 24 hours and untreated cells were used as control.

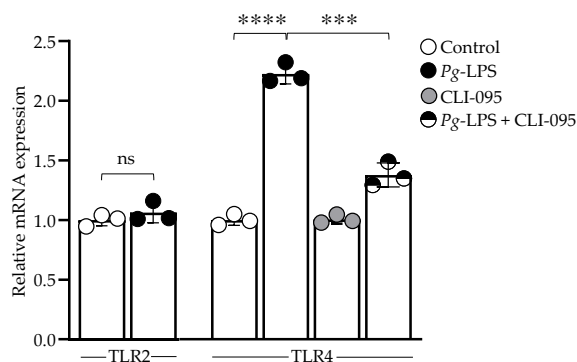

**Supplementary Figure S2.** Effects of *P. gingivalis*-LPS on mRNA expression of TLR2 and TLR4. RT-qPCR analysis showing the gene expression of TLR2 in untreated control and cells treated with 10 μg/ml concentration of *P. gingivalis*-LPS, and TLR4 gene expression in untreated control, cells treated with 10 μg/ml concentration of *P. gingivalis*-LPS, CLI-095 (1μM), *P. gingivalis*-LPS + CLI-095 (1μM) (n=3). \*\*\* $p < 0.001$ , \*\*\*\* $p < 0.0001$ , ns:  $p > 0.05$ .

A

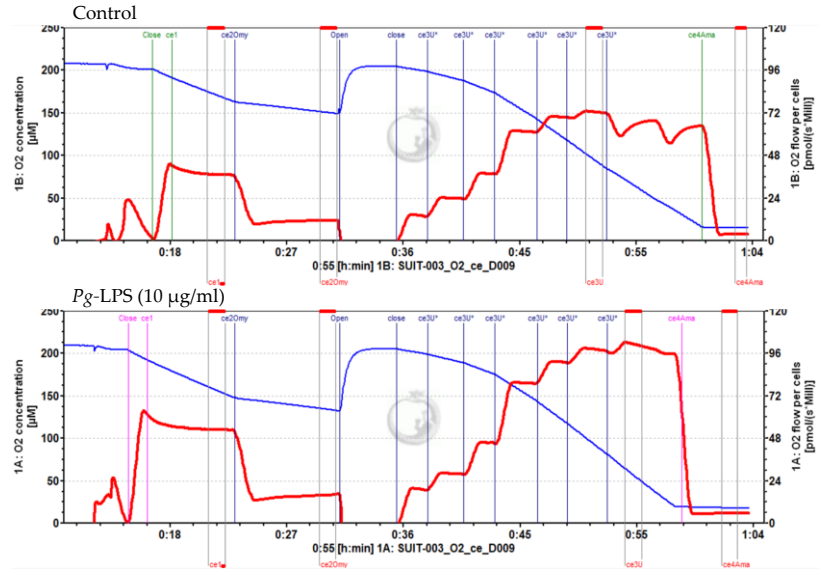

B

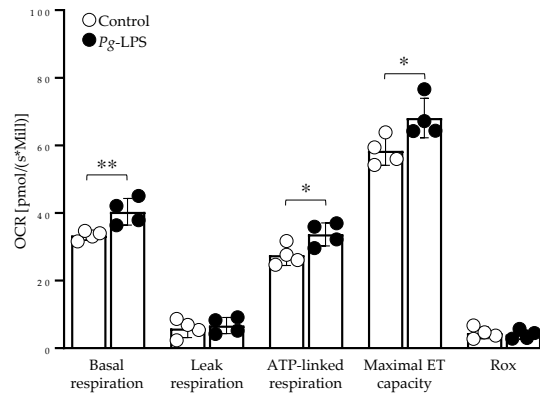

**Supplementary Figure S3.** High-resolution respiratory analysis of oxidative phosphorylation in Oroboros O2K respirometer. (A) OCR and (B) Basal respiration, leak respiration, ATP-linked respiration, Maximum ET capacity was measured from intact SH-SY5Y cells treated with 10 µg/ml *P. gingivalis* LPS for 24 hours and untreated cells were used as control (n=4). \* $p < 0.05$ , \*\* $p < 0.01$ , ns:  $p > 0.05$ .

**Supplement Table S1.** List of primer sequences used for qPCR analysis.

| Primer Name     | Primer Sequence (5'--3')       |
|-----------------|--------------------------------|
| <i>Tau</i> -F   | 5'-GATTGGGTCCTGGACAATA-3'      |
| <i>Tau</i> -R   | 5'-GTGGTCTGTCTTGGCTTTGG-3'     |
| <i>VEGF</i> -F  | 5'- TGCAGATTATGCGGATCAAAC C-3' |
| <i>VEGF</i> -R  | 5'-TGCATTACATTGTGTGCTGTAC-3'   |
| <i>TGF-β</i> -F | 5'- GCGTGCTAATGGTGAAACC-3'     |

|                    |                                 |
|--------------------|---------------------------------|
| <i>TGF-β-R</i>     | 5'- CGGAGCTCTGATGTGTTGAAGA-3'   |
| <i>IL-1β-F</i>     | 5'-ATGGGATAACGAGGCTTATGTG-3'    |
| <i>IL-1β-R</i>     | 5'-CAAGGCCACAGGTATTTTGTG-3'     |
| <i>IL-6F</i>       | 5'-ACTTGCCTGGTGAATCAT-3'        |
| <i>IL-6R</i>       | 5'-CAGGAAGTGGATCAGGACTT-3'      |
| <i>TNF-α-F</i>     | 5'-TCAGCAAGGACAGCAGAGG-3'       |
| <i>TNF-α-R</i>     | 5'-CAGTATGTGAGAGGAAGAGAACC-3'   |
| <i>iNOS-F</i>      | 5'-GCAGAATGTGACCATCATGG-3'      |
| <i>iNOS-R</i>      | 5'-ACAACCTTGGTGTGAAGGC-3'       |
| <i>TLR2-F</i>      | 5'- CTTTCACTGCTTTCAACTGGTA -3'  |
| <i>TLR2-R</i>      | 5'-TTGCGGTCAACAAGACAGAG -3'     |
| <i>TLR4-F</i>      | 5'-GACTTGCGGGTTCTACATCA-3'      |
| <i>TLR4-R</i>      | 5'-GAGGTGGCTTAGGCTCTGATA-3'     |
| <i>SRF-F</i>       | 5'- GGGCCGCGTGAAGATCAA-3'       |
| <i>SRF-R</i>       | 5'- GTCAGCGTGGACAGCTCATA-3'     |
| <i>p49/STRAP-F</i> | 5'- GAAGACACCTGCTGACCCAA-3'     |
| <i>p49/STRAP-R</i> | 5'- TCTTCTCCGCCATCACTGTT-3'     |
| <i>PGC-1α-F</i>    | 5'- ACCCACAGAGAACAGAAACAG-3'    |
| <i>PGC-1α-R</i>    | 5'- GGGTCAGAGGAAGAGATAAAGTTG-3' |
| <i>PGC-1β -F</i>   | 5'- ACTACTTCGCTGACACGCAG-3'     |
| <i>PGC-1β -R</i>   | 5'- CTCTGAGTTCTCTGGGCACC-3'     |
| <i>NRF1-F</i>      | 5'- GGAAACGGCCTCATGTATTG-3'     |
| <i>NRF1-R</i>      | 5'- GTTTGGAGGGTGAGATACAGAG-3'   |
| <i>TFam-F</i>      | 5'- TTTCTCCGAAGCATGTGGG-3'      |
| <i>TFam-R</i>      | 5'-GCCAAGACAGATGAAAACCAC -3'    |
| <i>MFN1-F</i>      | 5'- TGGCATCTGTGGCCGAGTT-3'      |
| <i>MFN1-R</i>      | 5'-GAAACAGGTTCTGCCATTATGCT -3'  |
| <i>MFN2-F</i>      | 5'- CGCGCTTATCCACTTCCCTC-3'     |
| <i>MFN2-R</i>      | 5'- AGAAGAGCAGGGACATTGCG-3'     |
| <i>Fis1-F</i>      | 5'- TGACATCCGTAAAGGCATCG-3'     |
| <i>Fis1-R</i>      | 5'-CTTCTCGTATTCCTTGAGCCG -3'    |
| <i>Opa1-F</i>      | 5'- GGAGAACCATATTCGTTTTGACC-3'  |
| <i>Opa1-R</i>      | 5'- AGAGCTGTTCCCTTTTCCTG-3'     |
| <i>NDUFV1-F</i>    | 5'- CGGGTATCTGTGCGTTTCAG-3'     |
| <i>NDUFV1-R</i>    | 5'- GGTCTTCATCCTTCAGCGAG-3'     |
| <i>NDUFV2-F</i>    | 5'- GGCAAATCCCAAACCAGG-3'       |
| <i>NDUFV2-R</i>    | 5'- TGCTTGACACCAAATCGAGG-3'     |
| <i>NDUFAB1-F</i>   | 5'-TCCAGGACCGTGTCTTTACG -3'     |
| <i>NDUFAB1-R</i>   | 5'- GGTCCAAACTGTCTAAGCCC-3'     |
| <i>NDUFS1-F</i>    | 5'- ACTCTGACACCTTATGCACTG-3'    |
| <i>NDUFS1-R</i>    | 5'- AACATCTGGCTCTTCCACAC-3'     |

F: forward primer; R: reverse primer.
